# Supplementary material for: An Insect Nidovirus Emerging from a Primary Tropical Rainforest
Source: PubMed Central journal article supplement — mBio. 2011 Jun 14;2(3):e00077-11. doi: 10.1128/mBio.00077-11 (PMC3111606; doi:10.1128/mbio.00077-11), 2011-06-14
Supplement: mBio.00077-11-st1.pdf [file mBio.00077-11-st1.pdf]

1 **Supplementary Table S1:** CAVV primers used in this study.

| <b>Primer Name*</b> | <b>Sequence 5' → 3'</b>      |
|---------------------|------------------------------|
| C79_3F              | CTAATGAAAATTTTGTTTTCTCAC     |
| C79_32F             | ACTACTACTACAAGTATAACCCC      |
| C79_73F             | GCTAAACTCTGATCACCAAACC       |
| C79_104F            | CAGTTGCTTAAAGAACCTCTTG       |
| C79_107R            | ACTGATGTGGCTAGGTTTGGTGAT     |
| C79_126F            | AGACACTCTCCCACTTAACATC       |
| C79_152F            | AGGAATCTTCGATGCTACAACA       |
| C79_177F            | TGGCTAGTAAACAATAAATCCACAC    |
| C79_209F            | AGTTGTAAGAGGCCATAGGTC        |
| C79_238F            | GAAAGGTTTGTCTATTGTTGC        |
| C79_4523F           | CGCCGCTTCAAACCCCTCAA         |
| C79_4999R           | GGGTCAAATAACATACCTCCAC       |
| C79_15920F          | GTCCCAACTACTGAAACCA          |
| C79_16229R          | ATCAACAGTAAGAGCAGGAAGT       |
| C79_17705F          | GGATTTTGCCGTGAAGGTGAGAG      |
| C79_18216R          | GCATCGTATTTAGCATTGACATCG     |
| C79_18498F          | CTCCACTCAACATTGTA CTGC       |
| C79_18669R          | AAACCAGTAGTGTGGGTCAAG        |
| C79_18826F          | TCCAATTTTCATCGCATGTTTCGT     |
| C79_19002R          | CAGAAGCCATAGTATATTGCGGT      |
| C79_19408F          | AGTATGCTAGATCTTGTGTTGG       |
| C79_19543R          | GTGATGTTATTTTACATGAATGATCGGC |
| C79_19552F          | AAGTTCGACCACTGAATGAGAC       |
| C79_19626F          | ACACATCGTACCGGCCATTCTTTG     |
| C79_20093R          | CGCCATACTACTAAGCCCTAAC       |
| CoV1-2a-KF          | CATCTAGCGACCTCCGTTTAG        |
| CoV1-2a-KR          | ATCGCGACCTCCACCTAAAC         |
| CoV2bcd-KF          | CATCTAGCACCTCCGTTTCGT        |

|            |                        |
|------------|------------------------|
| CoV2bcd-KR | CTAGCGACCTCCACACGAAC   |
| CoV3a-KF   | CCATCTAGCGCTCTTGTTAAG  |
| CoV3a-KR   | CTAGCGACCTCCACCTTAACAA |
| CoV3b-KF   | CTCTAGCGACCTCCCTGTTT   |
| CoV3b-KR   | ATCTAGCGACCTCCACAAACA  |
| CoV3c-KF   | ATCTAGCGACTCGACTGGTGT  |
| CoV3c-KR   | CTAGCGACCTCCACACACCA   |
| ToV-KF     | CACTACGACCTCCACCTAAACA |
| ToV-KR     | CCATAGCGACCTCCACTGTTAG |

1 \* Primers are named according to 5' location of primer on the CAVV genome.

2
